# Supplementary material
Source: PubMed Central journal article supplement (PMC30698)
Supplement: pnas_051633298_1.pdf [file pnas_051633298_1.pdf]

Table 1. Descriptive and nadir values for closed, first opening, and last opening duration histograms

| ATP  | Exp. no. | Closed Duration |          |          |            |              | First Opening Duration |          |          |          |       | Last Opening Duration |          |          |          |       |
|------|----------|-----------------|----------|----------|------------|--------------|------------------------|----------|----------|----------|-------|-----------------------|----------|----------|----------|-------|
|      |          | $t_{cs}$        | $A_{cs}$ | $t_{cl}$ | $A_{cl}$   | Nadir        | $t_{os}$               | $A_{os}$ | $t_{ol}$ | $A_{ol}$ | Nadir | $t_{os}$              | $A_{os}$ | $t_{ol}$ | $A_{ol}$ | Nadir |
| 1 mM | 1002     | 1.61            | 0.98     | 1778.00  | 0.02       | 12.59-125.89 | 1.14                   | 0.73     | 20.35    | 0.27     | 5.01  | 0.89                  | 0.49     | 20.54    | 0.51     | 3.09  |
|      | 1003     | 1.62            | 0.98     | 319.00   | 0.02       | 15.49-79.43  | 1.38                   | 0.79     | 28.86    | 0.22     | 6.45  | 1.25                  | 0.32     | 24.16    | 0.68     | 3.16  |
|      | 1005     | 1.65            | 0.99     | 277.00   | 0.01       | 14.13-112.30 | 1.27                   | 0.81     | 21.77    | 0.19     | 2.51  | 1.14                  | 0.30     | 19.89    | 0.71     | 6.02  |
|      | 1006     | 2.04            | 0.98     | 1963.00  | 0.02       | 16.22-158.49 | 0.86                   | 0.82     | 34.88    | 0.18     | 5.75  | 0.86                  | 0.30     | 33.30    | 0.70     | 2.04  |
|      | 40103    | 2.64            | 0.99     | 2464.00  | 0.01       | 22.39-223.87 | 1.88                   | 0.67     | 23.40    | 0.33     | 5.30  | 4.90                  | 0.49     | 9.70     | 0.51     | 7.94  |
|      | 40208    | 1.69            | 0.99     | 1789.00  | 0.01       | 12.59-100.89 | 1.30                   | 0.93     | 11.00    | 0.07     | 7.58  | 0.90                  | 0.44     | 7.40     | 0.56     | 2.00  |
|      | 82601    | 1.15            | 0.99     | 556.73   | 0.01       | 10.00-63.10  | 0.85                   | 0.93     | 35.00    | 0.07     | 5.62  | 0.98                  | 0.19     | 13.79    | 0.81     | 1.41  |
|      | Mean     | 1.77            | 0.99     | 1306.68  | 0.01       | 15.07-136.73 | 1.24                   | 0.81     | 22.18    | 0.19     | 5.60  | 1.56                  | 0.36     | 18.40    | 0.64     | 3.67  |
| SEM  | 0.19     | 0.00            | 319.87   | 0.00     | 1.58,20.14 | 0.14         | 0.04                   | 4.78     | 0.04     | 0.63     | 0.71  | 0.05                  | 4.16     | 0.05     | 1.17     |       |
| 1 nM |          | $t_{cs}$        | $A_{cs}$ | $t_{cl}$ | $A_{cl}$   | Nadir        | $t_{os}$               | $A_{os}$ | $t_{ol}$ | $A_{ol}$ | Nadir | $t_{os}$              | $A_{os}$ | $t_{ol}$ | $A_{ol}$ | Nadir |
|      | 7240     | 1.24            | 0.98     | 272.00   | 0.02       | 10.00-79.43  | 1.04                   | 0.93     | 32.75    | 0.07     | 6.91  | 0.93                  | 0.31     | 37.70    | 0.69     | 2.82  |
|      | 8272     | 1.18            | 0.99     | 1064.00  | 0.01       | 10.0-251.20  | 0.82                   | 0.92     | 138.78   | 0.08     | 6.30  | 0.76                  | 0.40     | 22.20    | 0.60     | 2.51  |
|      | 71200    | 1.25            | 0.99     | 2987.00  | 0.01       | 10.0-398.11  | 0.99                   | 0.76     | 72.70    | 0.24     | 6.31  | 0.87                  | 0.35     | 44.40    | 0.65     | 3.16  |
|      | 71204    | 1.02            | 0.99     | 401.54   | 0.01       | 7.94-83.18   | 0.44                   | 0.97     | 40.67    | 0.03     | 5.01  | 0.59                  | 0.44     | 31.18    | 0.56     | 2.45  |
|      | 82707    | 1.19            | 0.98     | 785.50   | 0.02       | 10.1-100.00  | 0.68                   | 0.69     | 24.24    | 0.31     | 3.16  | 0.47                  | 0.27     | 23.90    | 0.73     | 1.45  |
|      | Mean     | 1.18            | 0.98     | 1102.01  | 0.02       | 9.59-182.38  | 0.79                   | 0.86     | 61.73    | 0.14     | 5.54  | 0.72                  | 0.35     | 31.88    | 0.65     | 2.48  |
| SEM  | 0.04     | 0.00            | 439.74   | 0.00     | 0.37,56.04 | 0.10         | 0.05                   | 18.74    | 0.05     | 0.60     | 0.08  | 0.03                  | 3.73     | 0.03     | 0.26     |       |
| 0 mM |          | $t_{cs}$        | $A_{cs}$ | $t_{cl}$ | $A_{cl}$   | Nadir        | $t_{os}$               | $A_{os}$ | $t_{ol}$ | $A_{ol}$ | Nadir | $t_{os}$              | $A_{os}$ | $t_{ol}$ | $A_{ol}$ | Nadir |
|      | 4202     | 1.90            | 0.99     | 3514.00  | 0.01       | 15.9-251.2   | 4.12                   | 0.82     | 18.93    | 0.18     | 17.80 | 2.02                  | 0.47     | 14.33    | 0.53     | 5.01  |
|      | 40200    | 1.92            | 0.98     | 2925.00  | 0.02       | 15.85-158.49 | 3.34                   | 0.67     | 13.87    | 0.33     | 10.00 | 2.07                  | 0.31     | 18.90    | 0.69     | 3.24  |
|      | 72405    | 2.16            | 0.94     | 564.30   | 0.06       | 19.95-251.19 | 1.05                   | 0.24     | 20.07    | 0.76     | 2.00  | 1.24                  | 0.27     | 19.80    | 0.73     | 2.51  |
|      | 82707    | 1.72            | 0.98     | 2118.00  | 0.02       | 15.84-316.23 | 1.29                   | 0.34     | 36.26    | 0.66     | 3.98  | 1.16                  | 0.29     | 31.10    | 0.71     | 3.31  |
|      | 82711    | 2.13            | 0.96     | 1102.00  | 0.04       | 16.98-199.53 | 14.00                  | 0.92     | 111.00   | 0.08     | 79.00 | 2.92                  | 0.34     | 28.29    | 0.66     | 5.60  |
|      | Mean     | 1.97            | 0.97     | 2044.66  | 0.03       | 16.89-235.33 | 4.76                   | 0.60     | 40.03    | 0.40     | 22.56 | 1.88                  | 0.34     | 22.48    | 0.66     | 3.93  |
| SEM  | 0.07     | 0.01            | 490.69   | 0.01     | 0.71,23.86 | 2.13         | 0.12                   | 16.22    | 0.12     | 12.86    | 0.29  | 0.03                  | 2.79     | 0.03     | 0.52     |       |

Each histogram was fit to two exponentials, short (s) and long (l), to closed (c) and open (o) events. "t" indicates time constant, and "A" indicates fractional contribution of each t. The closed-duration nadir is given as a range. Note that closed-duration histograms at 1 nM and 0 mM ATP were from multichannel patches and thus greatly underestimate the true closed duration for a single channel. However, they were of value in discriminating between the short and long closed durations.
